# Supplementary material for: Transcriptional reprogramming in yeast using dCas9 and combinatorial gRNA strategies
Source: PubMed Central journal article supplement (PMC5353793; doi:10.1186/s12934-017-0664-2), 2017-03-15
Supplement: 12934_2017_664_MOESM2_ESM.pdf [file 12934_2017_664_MOESM2_ESM.pdf]

**A**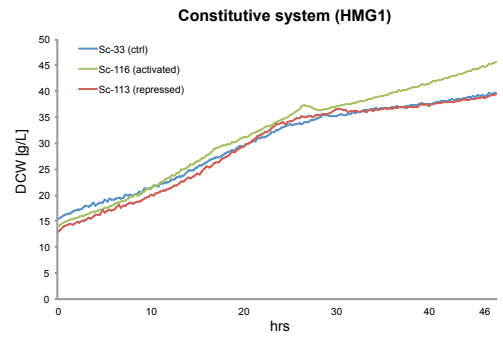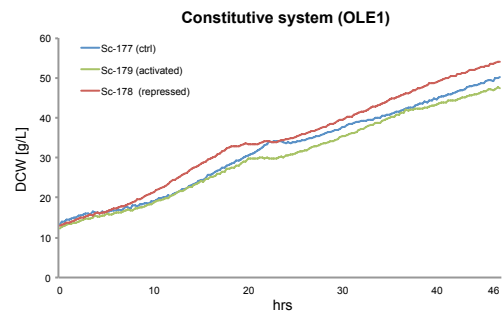**B**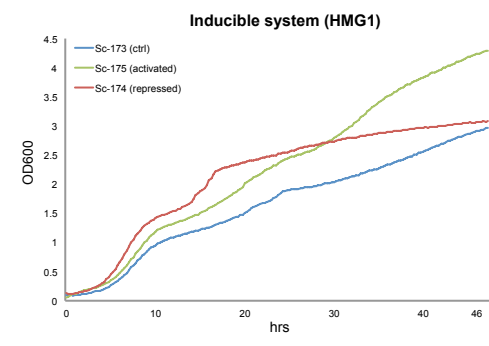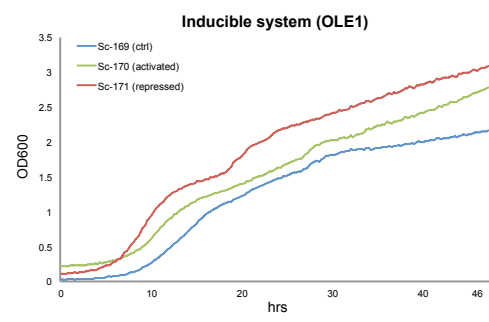**Supplementary Figure S1.**
